# Supplementary material for: Evolution of kdr haplotypes in worldwide populations of Aedes aegypti: Independent origins of the F1534C kdr mutation
Source: PubMed Central journal article supplement (PMC7188295; doi:10.1371/journal.pntd.0008219), 2020-04-16
Supplement: pntd.0008219.s001.pdf [file pntd.0008219.s001.pdf]

Supplementary Table S1

| Region          | Country       | City                  | Sample names  | Year of Collection | number of mosquitos | Latitude | Longitude | Barcode Name  | Barcode sequence | Bases      | >=Q20 Bases | Reads   | Average Length (bp) |
|-----------------|---------------|-----------------------|---------------|--------------------|---------------------|----------|-----------|---------------|------------------|------------|-------------|---------|---------------------|
| Central America | Mexico        | Amacuzac              | Amacuzac      | 2014               | 32                  | 18.600   | -99.370   | lonXpress_092 | CTAGGAACCGC      | 71,417,388 | 53,333,584  | 198,111 | 360                 |
| South America   | Brazil        | Aracaju               | Aracaju02     | 2002               | 30                  | -10.947  | -37.073   | lonXpress_001 | CTAAGGTAAC       | 577,747    | 479,349     | 2,033   | 284                 |
| South America   | Brazil        | Aracaju               | Aracaju06     | 2006               | 30                  | -10.947  | -37.073   | lonXpress_002 | TAAGGAGAAC       | 11,391,756 | 8,479,525   | 31,341  | 363                 |
| South America   | Brazil        | Aracaju               | Aracaju12     | 2001               | 30                  | -10.947  | -37.073   | lonXpress_003 | AAGAGGATTC       | 824,965    | 727,976     | 2,359   | 350                 |
| South America   | Brazil        | Araçatuba             | Aracatuba04   | 2004               | 30                  | -21.203  | -50.454   | lonXpress_004 | TACCAAGATC       | 10,366,382 | 7,855,338   | 28,349  | 366                 |
| South America   | Brazil        | Araçatuba             | Aracatuba07   | 2007               | 30                  | -21.203  | -50.454   | lonXpress_005 | CAGAAGGAAC       | 7,238,572  | 5,576,287   | 20,433  | 354                 |
| South America   | Brazil        | Araçatuba             | Aracatuba14   | 2014               | 30                  | -21.203  | -50.454   | lonXpress_006 | CTGCAAGTTC       | 252,440    | 220,996     | 826     | 306                 |
| South America   | Brazil        | Araçatuba             | Aracatuba14   | 2014               | 30                  | -21.203  | -50.454   | lonXpress_067 | TTCTTACCAGTC     | 35,636,915 | 27,639,240  | 91,386  | 390                 |
| South America   | Brazil        | Araguaina             | Araguaina06   | 2006               | 30                  | -7.193   | -48.205   | lonXpress_007 | TTCGTGATTC       | 8,461,146  | 5,994,157   | 27,557  | 307                 |
| South America   | Brazil        | Araguaina             | Araguaina12   | 2012               | 30                  | -7.193   | -48.205   | lonXpress_008 | TTCCGATAAC       | 36,575,647 | 26,280,539  | 95,497  | 383                 |
| South America   | Brazil        | Araguatins            | Araguatina12  | 2012               | 30                  | -5.648   | -48.119   | lonXpress_059 | TCCTTGATGTTTC    | 25,060,184 | 19,616,327  | 64,054  | 391                 |
| Asia            | Thailand      | Bangkok               | Bangkok       | 2013               | 32                  | 13.756   | 100.502   | lonXpress_065 | TCCTGGCACATC     | 20,960,710 | 15,848,175  | 54,914  | 382                 |
| South America   | Brazil        | Belém                 | Belem10       | 2010               | 30                  | -1.456   | -48.490   | lonXpress_009 | TGAGCGGAAC       | 3,505,003  | 3,100,535   | 9,156   | 383                 |
| Africa          | Guinea Bissau | Bijagos               | GBissau       | 2009               | 23                  | 11.804   | -15.180   | lonXpress_086 | CTTGGTTATTC      | 15,157,265 | 11,247,335  | 41,393  | 366                 |
| South America   | Brazil        | Boa Vista             | BVista10      | 2010               | 30                  | 2.492    | -60.403   | lonXpress_011 | TCCTCGAATC       | 127,019    | 110,445     | 375     | 339                 |
| South America   | Brazil        | Cabo Frio             | CFrio02       | 2002               | 30                  | -22.683  | -42.037   | lonXpress_032 | TCTTACACAC       | 1,323,746  | 1,061,165   | 3,510   | 377                 |
| South America   | Brazil        | Cabo Frio             | CFrio08       | 2008               | 30                  | -22.683  | -42.037   | lonXpress_033 | TTCTCATTGAAC     | 5,721,893  | 4,963,914   | 14,694  | 389                 |
| Oceania         | Australia     | Cairns                | Australia     | 2013               | 32                  | -16.557  | -145.464  | lonXpress_084 | CTTCCATAAC       | 3,535,300  | 2,770,728   | 9,106   | 388                 |
| South America   | Colombia      | Cali                  | Cali          | 2013               | 32                  | 3.452    | -76.532   | lonXpress_088 | CCGAACACTTC      | 39,302,839 | 29,317,072  | 105,655 | 372                 |
| North America   | USA           | California            | California    | 2013               | 29                  | 36.778   | -119.418  | lonXpress_081 | CCTGCCATTCCG     | 24,017,551 | 18,711,583  | 61,532  | 390                 |
| South America   | Brazil        | Campinas              | Campinas04    | 2004               | 30                  | -22.933  | -47.074   | lonXpress_061 | TCACTCGGATC      | 11,142,401 | 8,782,606   | 29,562  | 377                 |
| South America   | Brazil        | Campinas              | Campinas14    | 2014               | 30                  | -22.933  | -47.074   | lonXpress_068 | TCAAGAAGTTC      | 8,291,379  | 6,452,500   | 21,396  | 388                 |
| South America   | Brazil        | Campo Grande          | CGrande10     | 2010               | 30                  | -20.281  | 54.371    | lonXpress_012 | TAGGTGGTTC       | 582,635    | 514,687     | 1,515   | 385                 |
| South America   | Brazil        | Campos dos Goytacazes | Campos03      | 2003               | 30                  | -21.759  | -41.327   | lonXpress_058 | TCCTAGAACAC      | 6,636,947  | 5,111,885   | 17,722  | 375                 |
| Asia            | Philippines   | Cebu                  | Cbu           | 2013               | 32                  | 12.880   | 121.774   | lonXpress_064 | CTGAGTTCCGAC     | 20,805,930 | 16,141,621  | 53,439  | 389                 |
| Central America | Dominica      | Dominica              | Dominica      | 2009               | 32                  | 15.415   | -61.371   | lonXpress_063 | CCTTAGAGTTC      | 17,805,671 | 13,883,748  | 46,953  | 379                 |
| South America   | Brazil        | Duque de Caxias       | DCaxias01     | 2001               | 30                  | -22.786  | -43.305   | lonXpress_013 | TCTAACGGAC       | 21,475,625 | 16,196,894  | 56,419  | 381                 |
| South America   | Brazil        | Duque de Caxias       | DCaxias10     | 2010               | 30                  | -22.786  | -43.305   | lonXpress_014 | TTGGAGTGTC       | 967,645    | 836,956     | 2,604   | 372                 |
| South America   | Brazil        | Fortaleza             | Fortaleza04   | 2004               | 30                  | -3.436   | -38.314   | lonXpress_015 | TCTAGAGGTC       | 101,511    | 90,629      | 282     | 360                 |
| South America   | Brazil        | Foz do Iguaçu         | Flguaçu06     | 2006               | 30                  | -25.306  | -54.357   | lonXpress_016 | TCTGGATGAC       | 584,365    | 388,565     | 1,684   | 347                 |
| South America   | Brazil        | Goiânia               | Goiânia10     | 2010               | 30                  | -16.687  | -49.264   | lonXpress_018 | AGGCAATTGC       | 4,975,093  | 4,169,077   | 13,959  | 356                 |
| Africa          | Senegal       | Goudiri               | Goudiry       | 2012               | 30                  | 14.185   | -12.716   | lonXpress_077 | CGAAGCGATTC      | 24,362,523 | 19,057,940  | 64,130  | 380                 |
| South America   | Brazil        | Governador Valadares  | GValadares11  | 2011               | 30                  | -18.855  | -41.956   | lonXpress_019 | TTAGTCGGAC       | 3,921,064  | 3,353,823   | 10,443  | 375                 |
| Central America | Haiti         | Haiti                 | Haiti         | 2010               | 30                  | 18.971   | -72.285   | lonXpress_050 | CGGACAATGGC      | 17,081,573 | 13,237,071  | 44,232  | 386                 |
| Pacific         | USA           | Hawaii                | Hawaii        | 2009               | 25                  | 19.894   | -155.582  | lonXpress_091 | CGGAAGGATGC      | 19,567,463 | 15,034,721  | 53,149  | 368                 |
| Central America | Mexico        | Iguala                | Iguala        | 2012               | 32                  | 18.345   | -99.540   | lonXpress_085 | CCAGCCTCAAC      | 18,514,464 | 14,399,287  | 48,362  | 383                 |
| South America   | Brazil        | Itacoatiara           | Itacoatiara15 | 2015               | 30                  | -3.335   | -58.554   | lonXpress_066 | CCGCAATCATC      | 34,390,761 | 26,838,313  | 96,584  | 356                 |
| South America   | Brazil        | Itaperuna             | Itaperuna02   | 2002               | 30                  | -21.238  | -41.898   | lonXpress_028 | ATCCGGAATC       | 6,285,000  | 5,525,119   | 16,324  | 385                 |
| Asia            | Saudi Arabia  | Jeddah                | SArabia       | 2012               | 32                  | 21.486   | 39.192    | lonXpress_095 | CGGACAGATC       | 62,550,861 | 47,872,422  | 160,586 | 390                 |
| Africa          | Uganda        | Lunyo                 | Lunyo         | 2013               | 31                  | 0.072    | 32.462    | lonXpress_083 | CTAGGACATTC      | 8,470,227  | 6,317,147   | 21,713  | 390                 |
| South America   | Brazil        | Macapá                | Macapá14      | 2014               | 30                  | 0.036    | -51.071   | lonXpress_020 | CAGATCCATC       | 4,463,093  | 3,945,396   | 11,593  | 385                 |
| South America   | Brazil        | Maceió                | Maceio09      | 2009               | 30                  | -9.650   | -35.709   | lonXpress_021 | TCGCAATTAC       | 4,816,274  | 4,185,606   | 12,541  | 384                 |
| South America   | Brazil        | Manaus                | Manaus09      | 2009               | 30                  | -3.119   | -60.022   | lonXpress_022 | TTCCGAGACGC      | 2,375,399  | 1,986,854   | 6,803   | 349                 |
| South America   | Brazil        | Marabá                | Maraba10      | 2010               | 30                  | -5.593   | -50.182   | lonXpress_023 | TGCCACGAAC       | 9,314,920  | 8,223,810   | 24,158  | 386                 |
| South America   | Brazil        | Marília               | Marilia14     | 2014               | 30                  | -22.218  | -49.951   | lonXpress_069 | TTCAATTGGC       | 22,063,645 | 17,105,151  | 57,343  | 385                 |
| South America   | Brazil        | Marília               | Marilia11     | 2011               | 30                  | -22.218  | -49.951   | lonXpress_055 | TCCACCTCTC       | 3,370,549  | 2,590,706   | 10,788  | 312                 |

Supplementary Table S1

| Region          | Country   | City                  | Sample names | Year of Collection | number of mosquitos | Latitude | Longitude | Barcode Name  | Barcode sequence | Bases         | >=Q20 Bases   | Reads     | Average Length (bp) |
|-----------------|-----------|-----------------------|--------------|--------------------|---------------------|----------|-----------|---------------|------------------|---------------|---------------|-----------|---------------------|
| South America   | Brazil    | Marília               | Marilia04    | 2004               | 30                  | -22.218  | -49.951   | lonXpress_074 | CGATCGGTTC       | 43,133,652    | 33,269,030    | 134,724   | 320                 |
| Central America | Mexico    | Mazatan               | Mazatan      | 2012               | 32                  | 14.861   | -92.448   | lonXpress_090 | CTAACACGGC       | 21,247,678    | 16,451,733    | 56,465    | 376                 |
| South America   | Brazil    | Montes Claros         | MClaros06    | 2006               | 30                  | -16.434  | -43.513   | lonXpress_024 | AACCTCATTC       | 11,127,137    | 9,879,189     | 29,097    | 382                 |
| South America   | Brazil    | Mossoró               | Mossoro09    | 2009               | 30                  | -5.184   | -37.348   | lonXpress_025 | CCTGAGATAC       | 5,842,423     | 4,914,301     | 15,142    | 386                 |
| South America   | Brazil    | Mossoró               | Mossoro11    | 2011               | 30                  | -5.184   | -37.348   | lonXpress_026 | TTACAACCTC       | 4,806,993     | 4,095,171     | 12,379    | 388                 |
| Africa          | Kenya     | Nairobi               | Kenya        | 2012               | 32                  | -0.024   | 37.906    | lonXpress_096 | TTAAGCGGTC       | 37,176,652    | 29,087,317    | 99,329    | 374                 |
| North America   | USA       | New Orleans           | NORleans     | 2012               | 30                  | 29.951   | -90.072   | lonXpress_082 | TTGGCATCTC       | 25,851,646    | 20,136,436    | 66,502    | 389                 |
| Africa          | Senegal   | Ngari                 | Ngari        | 2012               | 16                  | 14.412   | -12.907   | lonXpress_080 | TCGAAGGCAGGC     | 14,395,728    | 11,025,557    | 37,813    | 381                 |
| South America   | Brazil    | Niterói               | Niteroi01    | 2001               | 30                  | -22.886  | -43.115   | lonXpress_027 | AACCATCCGC       | 3,184,819     | 2,650,072     | 8,445     | 377                 |
| South America   | Brazil    | Niterói               | Niteroi01    | 2001               | 30                  | -22.886  | -43.115   | lonXpress_057 | TCTGGCAACGGC     | 22,634,192    | 17,691,125    | 58,592    | 386                 |
| South America   | Brazil    | Nova Iguaçu           | NIguaçu09    | 2009               | 30                  | -22.756  | -43.461   | lonXpress_029 | TCGACCACTC       | 2,137,617     | 1,791,237     | 5,677     | 377                 |
| South America   | Brazil    | Nova Iguaçu           | NIguaçu03    | 2003               | 30                  | -22.756  | -43.461   | lonXpress_062 | TTCTGTCTCAC      | 14,799,439    | 11,234,258    | 38,733    | 382                 |
| South America   | Brazil    | Oiapoque              | Oiapoque14   | 2014               | 30                  | 3.845    | -51.833   | lonXpress_030 | CGAGGTATATC      | 1,121,906     | 958,862       | 2,869     | 391                 |
| South America   | Brazil    | Pacaraima             | Pacaraima11  | 2011               | 30                  | 4.479    | -61.147   | lonXpress_031 | TCCAAGCTGC       | 777,472       | 675,959       | 2,053     | 379                 |
| South America   | Brazil    | Palmas                | Palmas05     | 2005               | 30                  | -10.249  | -48.324   | lonXpress_034 | TCGCATCGTTC      | 3,806,540     | 3,348,807     | 10,130    | 376                 |
| South America   | Brazil    | Palmas                | Palmas12     | 2012               | 30                  | -10.249  | -48.324   | lonXpress_035 | TAAGCATTGTC      | 27,527,387    | 24,262,873    | 70,977    | 388                 |
| South America   | Brazil    | Parnaíba              | Parnaiba05   | 2005               | 30                  | -2.906   | -41.773   | lonXpress_052 | CCGCATGGAAC      | 1,912,701     | 1,496,744     | 4,959     | 386                 |
| South America   | Brazil    | Parnamirim            | Parnamirim09 | 2009               | 30                  | -5.544   | -35.162   | lonXpress_036 | AAGGAATCGTC      | 3,679,281     | 3,224,563     | 9,586     | 384                 |
| South America   | Brazil    | Presidente Prudente   | PPrudente14  | 2014               | 30                  | -22.814  | -51.232   | lonXpress_070 | CCTACTGGTC       | 30,533,913    | 23,202,800    | 83,966    | 364                 |
| Central America | USA       | Puerto Rico           | PuertoRico   | 2014               | 31                  | 18.220   | -66.589   | lonXpress_079 | CCTGGTTGTC       | 27,806,860    | 20,947,234    | 71,096    | 391                 |
| South America   | Brazil    | Ribeirão Preto        | RibPreto09   | 2009               | 30                  | -21.178  | -47.813   | lonXpress_056 | CAGCATTAAATC     | 21,982,714    | 17,543,867    | 56,809    | 387                 |
| South America   | Brazil    | Ribeirão Preto        | RibPreto14   | 2014               | 30                  | -21.178  | -47.813   | lonXpress_071 | TGAGGCTCCGAC     | 14,346,840    | 11,519,780    | 38,451    | 373                 |
| South America   | Brazil    | Ribeirão Preto        | RibPreto11   | 2011               | 30                  | -21.178  | -47.813   | lonXpress_073 | TCTGCCTGTC       | 32,907,078    | 25,062,610    | 85,489    | 385                 |
| South America   | Brazil    | Rio Branco            | RBRanco05    | 2005               | 30                  | -9.975   | -68.429   | lonXpress_037 | CTTGAGAATGTC     | 2,370,424     | 2,047,850     | 6,389     | 371                 |
| South America   | Brazil    | Rio Branco            | RBRanco11    | 2011               | 30                  | -9.975   | -68.429   | lonXpress_038 | TGGAGGACGGAC     | 1,850,821     | 1,621,579     | 4,840     | 382                 |
| South America   | Brazil    | Salvador              | Salvador08   | 2008               | 30                  | -12.584  | -38.306   | lonXpress_039 | TAACAATCGGC      | 1,085         | 671           | 5         | 217                 |
| South America   | Brazil    | Salvador              | Salvador11   | 2011               | 30                  | -12.584  | -38.306   | lonXpress_040 | CTGACATAATC      | 285           | 254           | 2         | 143                 |
| South America   | Brazil    | Santa Bárbara         | SBarbara08   | 2008               | 30                  | -28.385  | -53.258   | lonXpress_049 | TCCTAACATAAC     | 24,901,187    | 17,877,093    | 65,955    | 378                 |
| South America   | Brazil    | Santa Rosa            | SRosa06      | 2006               | 30                  | -21.178  | -47.813   | lonXpress_041 | TTCCACTTCGC      | 178           | 178           | 1         | 178                 |
| South America   | Brazil    | Santa Rosa            | SRosa11      | 2011               | 30                  | -21.178  | -47.813   | lonXpress_042 | AGCACGAATC       | 272           | 262           | 1         | 272                 |
| South America   | Brazil    | Santarém              | Santarem10   | 2010               | 30                  | -2.272   | -54.423   | lonXpress_043 | CTTGACACCGC      | 1,639         | 1,567         | 6         | 273                 |
| South America   | Brazil    | Santos                | Santos11     | 2011               | 30                  | -23.554  | -46.215   | lonXpress_044 | TTGGAGGCCAGC     | 777           | 543           | 3         | 259                 |
| South America   | Brazil    | Santos                | Santos14     | 2014               | 30                  | -23.554  | -46.215   | lonXpress_045 | TGGAGCTTCTC      | 1,864         | 1,614         | 6         | 311                 |
| South America   | Brazil    | São Gonçalo           | SGonçalo01   | 2001               | 30                  | -22.494  | -43.350   | lonXpress_046 | TCAGTCCGAAC      | 396           | 389           | 1         | 396                 |
| South America   | Brazil    | São Gonçalo           | SGonçalo08   | 2008               | 30                  | -22.494  | -43.350   | lonXpress_047 | TAAGGCAACCAC     | 305           | 290           | 1         | 305                 |
| South America   | Brazil    | São José do Rio Preto | SJRPreto08   | 2008               | 30                  | -20.812  | -49.376   | lonXpress_051 | TTGAGCCTATTC     | 12,410,461    | 9,468,898     | 32,924    | 377                 |
| South America   | Brazil    | São José do Rio Preto | SJRPreto14   | 2014               | 30                  | -20.812  | -49.376   | lonXpress_072 | CGAAGCCACAC      | 30,835,395    | 24,264,275    | 82,675    | 373                 |
| Africa          | Senegal   | Sedhiou               | Sedhiou      | 2012               | 31                  | 12.884   | -15.594   | lonXpress_076 | CGGAAGAACCTC     | 52,516,637    | 40,351,725    | 140,448   | 374                 |
| Pacific         | Tahiti    | Tahiti                | Tahiti       | 2010               | 30                  | -17.651  | -149.426  | lonXpress_078 | CAGCCAATTCTC     | 12,296        | 10,267        | 37        | 332                 |
| Oceania         | Australia | Townsville            | Townsville   | 2009               | 18                  | -19.259  | 146.817   | lonXpress_093 | CTGTCCAATC       | 29,284,159    | 19,683,499    | 77,395    | 378                 |
| South America   | Brazil    | Tubiacanga            | Tubiacanga15 | 2015               | 30                  | -22.475  | -43.133   | lonXpress_048 | TTCTAAGAGAC      | 0             | 0             | 0         | N/A                 |
| North America   | USA       | Tucson                | Tucson       | 2012               | 32                  | 32.223   | -110.975  | lonXpress_087 | TTGGCTGGAC       | 29,508,573    | 22,577,970    | 77,411    | 381                 |
| South America   | Brazil    | Urcu                  | Urcu15       | 2015               | 30                  | -22.954  | -43.168   | lonXpress_060 | TCTAGCTCTTC      | 16,320,729    | 12,346,797    | 43,384    | 376                 |
| South America   | Brazil    | Vila Velha            | VVelha06     | 2006               | 30                  | -20.348  | -40.295   | lonXpress_075 | TCAGGAATAC       | 38,614,966    | 29,879,255    | 139,591   | 277                 |
| Africa          | Cameroon  | Yaounde               | Yaounde      | 2014               | 32                  | 3.848    | 11.502    | lonXpress_094 | TCCGACAAGC       | 30,798,059    | 22,851,904    | 80,907    | 381                 |
| South America   | Venezuela | Zulia                 | Zulia        | 2004               | 32                  | 10.291   | -72.141   | lonXpress_089 | TCCTGAATCTC      | 24,388,957    | 17,873,213    | 63,764    | 382                 |
|                 |           |                       | 92 samples   |                    |                     |          | Total     |               |                  |               |               |           |                     |
|                 |           |                       |              |                    |                     |          |           |               |                  | 1,322,931,619 | 1,020,906,422 | 3,561,595 | 360.4505495         |
