# Supplementary material for: Evolution of kdr haplotypes in worldwide populations of Aedes aegypti: Independent origins of the F1534C kdr mutation
Source: PubMed Central journal article supplement (PMC7188295; doi:10.1371/journal.pntd.0008219), 2020-04-16
Supplement: pntd.0008219.s002.pdf [file pntd.0008219.s002.pdf]

| Region          | Country       | City                  | Year of Collection | state    | reads   | bases      | max | min | N50 | N90 |
|-----------------|---------------|-----------------------|--------------------|----------|---------|------------|-----|-----|-----|-----|
| Central America | Mexico        | Amacuzac              | 2014               | Raw      | 188,683 | 55,230,051 | 614 | 25  | 376 | 211 |
|                 |               |                       |                    | Filtered | 87,225  | 33,660,386 | 400 | 350 | 393 | 360 |
| South America   | Brazil        | Aracaju               | 2002               | Raw      | 1,849   | 488,146    | 432 | 25  | 376 | 179 |
|                 |               |                       |                    | Filtered | 757     | 287,756    | 400 | 350 | 377 | 375 |
| South America   | Brazil        | Aracaju               | 2006               | Raw      | 29,666  | 8,859,440  | 493 | 25  | 372 | 235 |
|                 |               |                       |                    | Filtered | 13,217  | 5,078,424  | 400 | 350 | 392 | 359 |
| South America   | Brazil        | Aracaju               | 2001               | Raw      | 2,343   | 758,897    | 414 | 25  | 378 | 253 |
|                 |               |                       |                    | Filtered | 1613    | 619,754    | 400 | 350 | 390 | 376 |
| South America   | Brazil        | Araçatuba             | 2004               | Raw      | 27,033  | 8,221,255  | 486 | 25  | 376 | 249 |
|                 |               |                       |                    | Filtered | 14,482  | 5,537,249  | 400 | 350 | 379 | 365 |
| South America   | Brazil        | Araçatuba             | 2007               | Raw      | 19,436  | 5,822,772  | 483 | 25  | 377 | 209 |
|                 |               |                       |                    | Filtered | 10540   | 4,073,210  | 400 | 350 | 394 | 373 |
| South America   | Brazil        | Araçatuba             | 2014               | Raw      | 813     | 227,553    | 405 | 25  | 377 | 164 |
|                 |               |                       |                    | Filtered | 418     | 160,943    | 400 | 350 | 392 | 376 |
| South America   | Brazil        | Araçatuba             | 2014               | Raw      | 87,690  | 28,511,099 | 494 | 25  | 395 | 289 |
|                 |               |                       |                    | Filtered | 60637   | 23,685,861 | 400 | 350 | 395 | 376 |
| South America   | Brazil        | Araguaina             | 2006               | Raw      | 25,341  | 6,081,028  | 462 | 25  | 356 | 147 |
|                 |               |                       |                    | Filtered | 8,676   | 3,259,358  | 400 | 350 | 376 | 360 |
| South America   | Brazil        | Araguaina             | 2012               | Raw      | 87,834  | 26,802,406 | 522 | 25  | 395 | 253 |
|                 |               |                       |                    | Filtered | 47478   | 18,595,120 | 400 | 350 | 395 | 382 |
| South America   | Brazil        | Araguatins            | 2012               | Raw      | 60,747  | 20,249,131 | 478 | 25  | 395 | 316 |
|                 |               |                       |                    | Filtered | 44,282  | 17,392,187 | 400 | 350 | 395 | 388 |
| Oceania         | Australia     | Cairns                | 2013               | Raw      | 8,703   | 2,927,649  | 612 | 25  | 395 | 285 |
|                 |               |                       |                    | Filtered | 6140    | 2,401,526  | 400 | 350 | 395 | 375 |
| Asia            | Thailand      | Bangkok               | 2013               | Raw      | 52,101  | 16,354,915 | 467 | 25  | 376 | 265 |
|                 |               |                       |                    | Filtered | 33,566  | 12,884,369 | 400 | 350 | 386 | 374 |
| South America   | Brazil        | Boa Vista             | 2010               | Raw      | 369     | 114,185    | 402 | 28  | 377 | 254 |
|                 |               |                       |                    | Filtered | 242     | 91,478     | 398 | 357 | 377 | 375 |
| South America   | Brazil        | Belém                 | 2010               | Raw      | 9,077   | 3,210,736  | 443 | 25  | 377 | 339 |
|                 |               |                       |                    | Filtered | 7,403   | 2,832,505  | 400 | 350 | 378 | 376 |
| South America   | Brazil        | Cabo Frio             | 2002               | Raw      | 3,408   | 1,078,160  | 486 | 25  | 378 | 266 |
|                 |               |                       |                    | Filtered | 1986    | 759,612    | 400 | 350 | 383 | 363 |
| South America   | Brazil        | Cabo Frio             | 2008               | Raw      | 14,573  | 5,136,123  | 464 | 25  | 392 | 334 |
|                 |               |                       |                    | Filtered | 11,396  | 4,419,017  | 400 | 350 | 392 | 375 |
| South America   | Brazil        | Campo Grande          | 2010               | Raw      | 1,506   | 533,518    | 405 | 28  | 392 | 347 |
|                 |               |                       |                    | Filtered | 1224    | 475,122    | 400 | 350 | 392 | 375 |
| South America   | Colombia      | Cali                  | 2013               | Raw      | 100,540 | 30,207,293 | 575 | 25  | 377 | 224 |
|                 |               |                       |                    | Filtered | 53,728  | 20,715,510 | 400 | 350 | 393 | 361 |
| North America   | USA           | California            | 2013               | Raw      | 59,420  | 19,427,490 | 557 | 25  | 393 | 281 |
|                 |               |                       |                    | Filtered | 38697   | 15,050,029 | 400 | 350 | 395 | 363 |
| South America   | Brazil        | Campinas              | 2004               | Raw      | 28,968  | 9,316,306  | 487 | 25  | 376 | 255 |
|                 |               |                       |                    | Filtered | 17,405  | 6,642,211  | 400 | 350 | 380 | 361 |
| South America   | Brazil        | Campinas              | 2014               | Raw      | 20,554  | 6,722,909  | 449 | 25  | 390 | 274 |
|                 |               |                       |                    | Filtered | 13742   | 5,305,989  | 400 | 350 | 393 | 374 |
| South America   | Brazil        | Campos dos Goytacazes | 2003               | Raw      | 16,998  | 5,384,658  | 432 | 25  | 376 | 250 |
|                 |               |                       |                    | Filtered | 9,994   | 3,817,569  | 400 | 350 | 390 | 359 |
| South America   | Brazil        | Duque de Caxias       | 2001               | Raw      | 53,220  | 16,828,935 | 551 | 25  | 392 | 247 |
|                 |               |                       |                    | Filtered | 31901   | 12,348,225 | 400 | 350 | 394 | 366 |
| South America   | Brazil        | Duque de Caxias       | 2010               | Raw      | 2,584   | 854,027    | 458 | 25  | 392 | 258 |
|                 |               |                       |                    | Filtered | 1,774   | 686,900    | 400 | 350 | 392 | 376 |
| Central America | Dominica      | Dominica              | 2009               | Raw      | 44,990  | 14,436,915 | 490 | 25  | 392 | 255 |
|                 |               |                       |                    | Filtered | 27580   | 10,720,734 | 400 | 350 | 395 | 374 |
| South America   | Brazil        | Foz do Iguaçu         | 2006               | Raw      | 1,543   | 398,340    | 436 | 25  | 352 | 171 |
|                 |               |                       |                    | Filtered | 549     | 206,456    | 397 | 350 | 376 | 353 |
| South America   | Brazil        | Fortaleza             | 2004               | Raw      | 279     | 94,439     | 398 | 26  | 377 | 268 |
|                 |               |                       |                    | Filtered | 201     | 77,068     | 398 | 355 | 379 | 376 |
| Africa          | Guinea Bissau | Bijagos               | 2009               | Raw      | 39,050  | 11,699,360 | 572 | 25  | 363 | 223 |
|                 |               |                       |                    | Filtered | 17,020  | 6,414,238  | 400 | 350 | 376 | 363 |
| South America   | Brazil        | Governador Valadares  | 2011               | Raw      | 10,346  | 3,406,514  | 499 | 25  | 381 | 281 |
|                 |               |                       |                    | Filtered | 6992    | 2,689,515  | 400 | 350 | 392 | 373 |
| South America   | Brazil        | Goiânia               | 2010               | Raw      | 13,669  | 4,228,156  | 471 | 25  | 377 | 240 |
|                 |               |                       |                    | Filtered | 7,660   | 2,936,609  | 400 | 350 | 387 | 372 |
| Africa          | Senegal       | Goudiri               | 2012               | Raw      | 62,510  | 20,116,937 | 497 | 25  | 376 | 255 |
|                 |               |                       |                    | Filtered | 34318   | 13,222,039 | 400 | 350 | 393 | 361 |
| Central America | Haiti         | Haiti                 | 2010               | Raw      | 42,790  | 13,902,753 | 493 | 25  | 377 | 262 |
|                 |               |                       |                    | Filtered | 26,556  | 10,198,443 | 400 | 350 | 392 | 361 |
| Pacific         | USA           | Hawaii                | 2009               | Raw      | 51,080  | 15,774,749 | 618 | 25  | 376 | 241 |
|                 |               |                       |                    | Filtered | 27025   | 10,397,777 | 400 | 350 | 392 | 361 |
| Central America | Mexico        | Iguala                | 2012               | Raw      | 46,874  | 15,027,017 | 486 | 25  | 383 | 257 |
|                 |               |                       |                    | Filtered | 28,797  | 11,093,705 | 400 | 350 | 392 | 363 |
| South America   | Brazil        | Itacoatiara           | 2015               | Raw      | 92,743  | 27,879,052 | 539 | 25  | 376 | 219 |
|                 |               |                       |                    | Filtered | 53295   | 20,496,747 | 400 | 350 | 383 | 375 |
| South America   | Brazil        | Itaperuna             | 2002               | Raw      | 16,230  | 5,770,717  | 482 | 25  | 391 | 335 |
|                 |               |                       |                    | Filtered | 13,032  | 5,020,949  | 400 | 350 | 392 | 376 |
| Africa          | Kenya         | Nairobi               | 2012               | Raw      | 94,195  | 30,298,276 | 540 | 25  | 395 | 255 |
|                 |               |                       |                    | Filtered | 58555   | 22,898,528 | 400 | 350 | 395 | 376 |
| Africa          | Uganda        | Lunyo                 | 2013               | Raw      | 20,598  | 6,617,714  | 495 | 25  | 394 | 255 |
|                 |               |                       |                    | Filtered | 11,748  | 4,589,712  | 400 | 350 | 395 | 376 |
| South America   | Brazil        | Montes Claros         | 2006               | Raw      | 28,941  | 10,339,698 | 461 | 25  | 392 | 340 |
|                 |               |                       |                    | Filtered | 23355   | 9,039,976  | 400 | 350 | 392 | 376 |
| South America   | Brazil        | Macapá                | 2014               | Raw      | 11,538  | 4,092,558  | 472 | 25  | 377 | 339 |
|                 |               |                       |                    | Filtered | 9,370   | 3,588,940  | 400 | 350 | 378 | 376 |
| South America   | Brazil        | Maceió                | 2009               | Raw      | 12,404  | 4,327,191  | 468 | 25  | 378 | 322 |
|                 |               |                       |                    | Filtered | 9688    | 3,717,280  | 400 | 350 | 380 | 376 |
| South America   | Brazil        | Manaus                | 2009               | Raw      | 6,729   | 2,017,006  | 503 | 25  | 376 | 228 |
|                 |               |                       |                    | Filtered | 3,329   | 1,264,881  | 400 | 350 | 377 | 374 |
| South America   | Brazil        | Marabá                | 2010               | Raw      | 23,976  | 8,467,556  | 465 | 25  | 392 | 342 |
|                 |               |                       |                    | Filtered | 19169   | 7,411,325  | 400 | 350 | 393 | 376 |
| South America   | Brazil        | Marília               | 2004               | Raw      | 126,803 | 34,402,116 | 625 | 25  | 392 | 188 |
|                 |               |                       |                    | Filtered | 47,009  | 18,453,678 | 400 | 350 | 395 | 388 |
| South America   | Brazil        | Marília               | 2011               | Raw      | 10,213  | 2,702,613  | 466 | 25  | 342 | 187 |
|                 |               |                       |                    | Filtered | 3448    | 1,309,476  | 400 | 350 | 376 | 374 |

| Region          | Country      | City                  | Year of Collection | state    | reads   | bases      | max | min | N50 | N90 |
|-----------------|--------------|-----------------------|--------------------|----------|---------|------------|-----|-----|-----|-----|
| South America   | Brazil       | Marília               | 2014               | Raw      | 54,378  | 17,825,170 | 619 | 25  | 392 | 274 |
|                 |              |                       |                    | Filtered | 36,745  | 14,246,442 | 400 | 350 | 395 | 374 |
| Central America | Mexico       | Mazatan               | 2012               | Raw      | 54,124  | 17,181,684 | 511 | 25  | 376 | 256 |
|                 |              |                       |                    | Filtered | 32,799  | 12,576,567 | 400 | 350 | 390 | 373 |
| South America   | Brazil       | Mossoró               | 2009               | Raw      | 14,963  | 5,065,435  | 518 | 25  | 380 | 293 |
|                 |              |                       |                    | Filtered | 10,453  | 4,021,936  | 400 | 350 | 392 | 374 |
| South America   | Brazil       | Mossoró               | 2011               | Raw      | 12,240  | 4,222,868  | 473 | 25  | 388 | 316 |
|                 |              |                       |                    | Filtered | 9088    | 3,500,762  | 400 | 350 | 392 | 375 |
| South America   | Brazil       | Nova Iguaçu           | 2003               | Raw      | 36,947  | 11,739,494 | 484 | 25  | 376 | 252 |
|                 |              |                       |                    | Filtered | 21,407  | 8,206,936  | 400 | 350 | 392 | 359 |
| South America   | Brazil       | Nova Iguaçu           | 2009               | Raw      | 5,631   | 1,831,514  | 492 | 25  | 390 | 271 |
|                 |              |                       |                    | Filtered | 3635    | 1,398,467  | 400 | 350 | 392 | 364 |
| North America   | USA          | New Orleans           | 2012               | Raw      | 64,018  | 20,760,049 | 532 | 25  | 394 | 284 |
|                 |              |                       |                    | Filtered | 43,039  | 16,801,836 | 400 | 350 | 395 | 376 |
| Africa          | Senegal      | Ngari                 | 2012               | Raw      | 36,086  | 11,529,403 | 589 | 25  | 376 | 263 |
|                 |              |                       |                    | Filtered | 17,518  | 6,715,008  | 400 | 350 | 377 | 374 |
| South America   | Brazil       | Niterói               | 2001               | Raw      | 56,165  | 18,590,191 | 484 | 25  | 377 | 273 |
|                 |              |                       |                    | Filtered | 37,446  | 14,377,199 | 400 | 350 | 392 | 366 |
| South America   | Brazil       | Niterói               | 2001               | Raw      | 8,296   | 2,713,207  | 516 | 25  | 377 | 276 |
|                 |              |                       |                    | Filtered | 5622    | 2,145,195  | 400 | 350 | 378 | 374 |
| South America   | Brazil       | Oiapoque              | 2014               | Raw      | 2,842   | 990,015    | 411 | 26  | 392 | 326 |
|                 |              |                       |                    | Filtered | 2,214   | 852,788    | 400 | 350 | 392 | 361 |
| South America   | Brazil       | Presidente Prudente   | 2014               | Raw      | 79,282  | 23,950,807 | 520 | 25  | 392 | 243 |
|                 |              |                       |                    | Filtered | 42940   | 16,684,656 | 400 | 350 | 395 | 375 |
| South America   | Brazil       | Pacaraima             | 2011               | Raw      | 2,029   | 693,116    | 469 | 25  | 377 | 315 |
|                 |              |                       |                    | Filtered | 1,545   | 591,649    | 400 | 350 | 378 | 376 |
| South America   | Brazil       | Palmas                | 2005               | Raw      | 10,071  | 3,489,944  | 515 | 25  | 377 | 321 |
|                 |              |                       |                    | Filtered | 7827    | 2,984,763  | 400 | 350 | 377 | 375 |
| South America   | Brazil       | Palmas                | 2012               | Raw      | 70,550  | 24,895,025 | 499 | 25  | 392 | 344 |
|                 |              |                       |                    | Filtered | 56,652  | 21,903,287 | 400 | 350 | 393 | 376 |
| Asia            | Philippines  | Cebu                  | 2013               | Raw      | 52,141  | 17,110,690 | 475 | 25  | 384 | 258 |
|                 |              |                       |                    | Filtered | 32,109  | 12,260,523 | 400 | 350 | 392 | 353 |
| South America   | Brazil       | Parnaíba              | 2005               | Raw      | 4,740   | 1,574,260  | 463 | 25  | 395 | 303 |
|                 |              |                       |                    | Filtered | 3,353   | 1,313,584  | 400 | 350 | 395 | 380 |
| South America   | Brazil       | Parnamirim            | 2009               | Raw      | 9,520   | 3,352,751  | 495 | 25  | 386 | 324 |
|                 |              |                       |                    | Filtered | 7503    | 2,889,418  | 400 | 350 | 392 | 376 |
| Central America | USA          | Puerto Rico           | 2014               | Raw      | 67,241  | 21,590,324 | 488 | 25  | 392 | 260 |
|                 |              |                       |                    | Filtered | 41,099  | 15,849,319 | 400 | 350 | 392 | 354 |
| South America   | Brazil       | Rio Branco            | 2005               | Raw      | 6,317   | 2,120,566  | 461 | 25  | 376 | 288 |
|                 |              |                       |                    | Filtered | 4488    | 1,710,774  | 400 | 350 | 377 | 374 |
| South America   | Brazil       | Rio Branco            | 2011               | Raw      | 4,789   | 1,654,602  | 480 | 25  | 377 | 331 |
|                 |              |                       |                    | Filtered | 3,747   | 1,434,464  | 400 | 350 | 378 | 376 |
| South America   | Brazil       | Ribeirão Preto        | 2009               | Raw      | 55,668  | 18,571,274 | 471 | 25  | 390 | 280 |
|                 |              |                       |                    | Filtered | 37822   | 14,581,791 | 400 | 350 | 392 | 372 |
| South America   | Brazil       | Ribeirão Preto        | 2011               | Raw      | 81,450  | 25,910,521 | 505 | 25  | 392 | 256 |
|                 |              |                       |                    | Filtered | 51,435  | 19,924,337 | 400 | 350 | 394 | 372 |
| South America   | Brazil       | Ribeirão Preto        | 2014               | Raw      | 37,455  | 12,039,723 | 488 | 25  | 392 | 253 |
|                 |              |                       |                    | Filtered | 23516   | 9,125,017  | 400 | 350 | 394 | 375 |
| Asia            | Saudi Arabia | Jeddah                | 2012               | Raw      | 155,156 | 49,740,298 | 547 | 25  | 391 | 261 |
|                 |              |                       |                    | Filtered | 101,072 | 39,022,118 | 400 | 350 | 394 | 374 |
| South America   | Brazil       | Santa Bárbara         | 2008               | Raw      | 62,108  | 18,450,273 | 485 | 25  | 376 | 225 |
|                 |              |                       |                    | Filtered | 31501   | 12,067,129 | 400 | 350 | 392 | 353 |
| South America   | Brazil       | São José do Rio Preto | 2008               | Raw      | 31,673  | 9,889,734  | 482 | 25  | 376 | 252 |
|                 |              |                       |                    | Filtered | 18,468  | 7,047,106  | 400 | 350 | 379 | 362 |
| South America   | Brazil       | São José do Rio Preto | 2014               | Raw      | 79,858  | 25,465,494 | 525 | 25  | 392 | 252 |
|                 |              |                       |                    | Filtered | 48814   | 18,938,634 | 400 | 350 | 395 | 374 |
| Africa          | Senegal      | Sedhiou               | 2012               | Raw      | 135,062 | 42,206,979 | 545 | 25  | 376 | 253 |
|                 |              |                       |                    | Filtered | 73,220  | 28,154,236 | 400 | 350 | 392 | 373 |
| North America   | USA          | Tuson                 | 2012               | Raw      | 73,610  | 23,500,152 | 618 | 25  | 376 | 258 |
|                 |              |                       |                    | Filtered | 45747   | 17,508,909 | 400 | 350 | 386 | 371 |
| Pacific         | Tahiti       | Tahiti                | 2010               | Raw      | 36      | 10,802     | 397 | 48  | 389 | 175 |
|                 |              |                       |                    | Filtered | 20      | 7,732      | 397 | 351 | 395 | 367 |
| Oceania         | Australia    | Townsville            | 2009               | Raw      | 71,107  | 19,315,928 | 516 | 25  | 387 | 199 |
|                 |              |                       |                    | Filtered | 28031   | 10,914,928 | 400 | 350 | 395 | 371 |
| South America   | Brazil       | Urca                  | 2015               | Raw      | 41,861  | 12,982,431 | 468 | 25  | 376 | 243 |
|                 |              |                       |                    | Filtered | 23,353  | 8,884,760  | 400 | 350 | 377 | 358 |
| South America   | Brazil       | Vila Velha            | 2006               | Raw      | 132,119 | 30,904,556 | 512 | 25  | 321 | 157 |
|                 |              |                       |                    | Filtered | 36181   | 14,216,705 | 400 | 350 | 395 | 391 |
| Africa          | Cameroon     | Yaounde               | 2014               | Raw      | 77,233  | 23,860,238 | 465 | 25  | 375 | 253 |
|                 |              |                       |                    | Filtered | 36,958  | 14,093,413 | 400 | 350 | 376 | 373 |
| South America   | Venezuela    | Zulia                 | 2004               | Raw      | 59,520  | 18,271,759 | 542 | 25  | 392 | 244 |
|                 |              |                       |                    | Filtered | 33730   | 13,036,133 | 400 | 350 | 394 | 361 |
