# Supplementary material for: Evolution of kdr haplotypes in worldwide populations of Aedes aegypti: Independent origins of the F1534C kdr mutation
Source: PubMed Central journal article supplement (PMC7188295; doi:10.1371/journal.pntd.0008219), 2020-04-16
Supplement: pntd.0008219.s003.pdf [file pntd.0008219.s003.pdf]

Supplementary Table S4

| IIIS6 haplotype frequencies | 356_00    | 356_01    | 356_02    | 356_03    | 356_04    | 356_05   | 356_06   | 356_07   | 356_08   | 356_09   | 356_10   | 356_11 | 356_12   | 356_13   | 356_14   | 356_15 | 356_16 | 356_17    |
|-----------------------------|-----------|-----------|-----------|-----------|-----------|----------|----------|----------|----------|----------|----------|--------|----------|----------|----------|--------|--------|-----------|
| AU_Cairns_13                | 1         | 0         | 0         | 0         | 0         | 0        | 0        | 0        | 0        | 0        | 0        | 0      | 0        | 0        | 0        | 0      | 0      | 0         |
| AU_Townsville_09            | 1         | 0         | 0         | 0         | 0         | 0        | 0        | 0        | 0        | 0        | 0        | 0      | 0        | 0        | 0        | 0      | 0      | 0         |
| BR_Aracaju_06               | 0.711075  | 0.0811075 | 0.207818  | 0         | 0         | 0        | 0        | 0        | 0        | 0        | 0        | 0      | 0        | 0        | 0        | 0      | 0      | 0         |
| BR_Aracaju_12               | 0.479452  | 0.520548  | 0         | 0         | 0         | 0        | 0        | 0        | 0        | 0        | 0        | 0      | 0        | 0        | 0        | 0      | 0      | 0         |
| BR_Aracatuba_04             | 0.83013   | 0.16987   | 0         | 0         | 0         | 0        | 0        | 0        | 0        | 0        | 0        | 0      | 0        | 0        | 0        | 0      | 0      | 0         |
| BR_Aracatuba_07             | 0.627169  | 0.372831  | 0         | 0         | 0         | 0        | 0        | 0        | 0        | 0        | 0        | 0      | 0        | 0        | 0        | 0      | 0      | 0         |
| BR_Araguaina_12             | 0.248493  | 0.751507  | 0         | 0         | 0         | 0        | 0        | 0        | 0        | 0        | 0        | 0      | 0        | 0        | 0        | 0      | 0      | 0         |
| BR_Araguains_12             | 0.43466   | 0.56534   | 0         | 0         | 0         | 0        | 0        | 0        | 0        | 0        | 0        | 0      | 0        | 0        | 0        | 0      | 0      | 0         |
| BR_Campinas_04              | 0.88466   | 0         | 0.11534   | 0         | 0         | 0        | 0        | 0        | 0        | 0        | 0        | 0      | 0        | 0        | 0        | 0      | 0      | 0         |
| BR_Campinas_14              | 0.344581  | 0.655419  | 0         | 0         | 0         | 0        | 0        | 0        | 0        | 0        | 0        | 0      | 0        | 0        | 0        | 0      | 0      | 0         |
| BR_Campos_03                | 0.720482  | 0.123695  | 0.155823  | 0         | 0         | 0        | 0        | 0        | 0        | 0        | 0        | 0      | 0        | 0        | 0        | 0      | 0      | 0         |
| BR_CFrio_02                 | 0.530488  | 0         | 0.469512  | 0         | 0         | 0        | 0        | 0        | 0        | 0        | 0        | 0      | 0        | 0        | 0        | 0      | 0      | 0         |
| BR_CFrio_08                 | 0.357537  | 0.579044  | 0.0634191 | 0         | 0         | 0        | 0        | 0        | 0        | 0        | 0        | 0      | 0        | 0        | 0        | 0      | 0      | 0         |
| BR_DCaxias_01               | 0.862079  | 0         | 0.137921  | 0         | 0         | 0        | 0        | 0        | 0        | 0        | 0        | 0      | 0        | 0        | 0        | 0      | 0      | 0         |
| BR_DCaxias_10               | 0.170909  | 0.76      | 0.0690909 | 0         | 0         | 0        | 0        | 0        | 0        | 0        | 0        | 0      | 0        | 0        | 0        | 0      | 0      | 0         |
| BR_Goiania_10               | 0.378205  | 0.621795  | 0         | 0         | 0         | 0        | 0        | 0        | 0        | 0        | 0        | 0      | 0        | 0        | 0        | 0      | 0      | 0         |
| BR_GValadares_11            | 0.24239   | 0.75761   | 0         | 0         | 0         | 0        | 0        | 0        | 0        | 0        | 0        | 0      | 0        | 0        | 0        | 0      | 0      | 0         |
| BR_Itacoatiara_15           | 0         | 1         | 0         | 0         | 0         | 0        | 0        | 0        | 0        | 0        | 0        | 0      | 0        | 0        | 0        | 0      | 0      | 0         |
| BR_Itaperuna_02             | 0.941176  | 0         | 0.0588235 | 0         | 0         | 0        | 0        | 0        | 0        | 0        | 0        | 0      | 0        | 0        | 0        | 0      | 0      | 0         |
| BR_Macapa_14                | 0.374003  | 0.625997  | 0         | 0         | 0         | 0        | 0        | 0        | 0        | 0        | 0        | 0      | 0        | 0        | 0        | 0      | 0      | 0         |
| BR_Maceio_09                | 0.720905  | 0.279095  | 0         | 0         | 0         | 0        | 0        | 0        | 0        | 0        | 0        | 0      | 0        | 0        | 0        | 0      | 0      | 0         |
| BR_Manauas_09               | 0.435065  | 0.493506  | 0         | 0.0714286 | 0         | 0        | 0        | 0        | 0        | 0        | 0        | 0      | 0        | 0        | 0        | 0      | 0      | 0         |
| BR_Maraba_10                | 0.406696  | 0.593304  | 0         | 0         | 0         | 0        | 0        | 0        | 0        | 0        | 0        | 0      | 0        | 0        | 0        | 0      | 0      | 0         |
| BR_Marilia_04               | 0.860049  | 0         | 0.139951  | 0         | 0         | 0        | 0        | 0        | 0        | 0        | 0        | 0      | 0        | 0        | 0        | 0      | 0      | 0         |
| BR_Marilia_11               | 0.0741688 | 0.925831  | 0         | 0         | 0         | 0        | 0        | 0        | 0        | 0        | 0        | 0      | 0        | 0        | 0        | 0      | 0      | 0         |
| BR_Marilia_14               | 0.742491  | 0.257509  | 0         | 0         | 0         | 0        | 0        | 0        | 0        | 0        | 0        | 0      | 0        | 0        | 0        | 0      | 0      | 0         |
| BR_MClaros_06               | 0.945111  | 0.0548885 | 0         | 0         | 0         | 0        | 0        | 0        | 0        | 0        | 0        | 0      | 0        | 0        | 0        | 0      | 0      | 0         |
| BR_Mossoro_09               | 0.860588  | 0.139412  | 0         | 0         | 0         | 0        | 0        | 0        | 0        | 0        | 0        | 0      | 0        | 0        | 0        | 0      | 0      | 0         |
| BR_Mossoro_11               | 0.863636  | 0.136364  | 0         | 0         | 0         | 0        | 0        | 0        | 0        | 0        | 0        | 0      | 0        | 0        | 0        | 0      | 0      | 0         |
| BR_Niguacu_03               | 0.686667  | 0         | 0.313333  | 0         | 0         | 0        | 0        | 0        | 0        | 0        | 0        | 0      | 0        | 0        | 0        | 0      | 0      | 0         |
| BR_Niguacu_09               | 0.26393   | 0.73607   | 0         | 0         | 0         | 0        | 0        | 0        | 0        | 0        | 0        | 0      | 0        | 0        | 0        | 0      | 0      | 0         |
| BR_Niteroi_01               | 0.943966  | 0.0560345 | 0         | 0         | 0         | 0        | 0        | 0        | 0        | 0        | 0        | 0      | 0        | 0        | 0        | 0      | 0      | 0         |
| BR_Oiapoque_14              | 0.133028  | 0.866972  | 0         | 0         | 0         | 0        | 0        | 0        | 0        | 0        | 0        | 0      | 0        | 0        | 0        | 0      | 0      | 0         |
| BR_Pacaraima_11             | 0.100503  | 0.899497  | 0         | 0         | 0         | 0        | 0        | 0        | 0        | 0        | 0        | 0      | 0        | 0        | 0        | 0      | 0      | 0         |
| BR_Palmas_05                | 0.753363  | 0.246637  | 0         | 0         | 0         | 0        | 0        | 0        | 0        | 0        | 0        | 0      | 0        | 0        | 0        | 0      | 0      | 0         |
| BR_Palmas_12                | 0.229806  | 0.770094  | 0         | 0         | 0         | 0        | 0        | 0        | 0        | 0        | 0        | 0      | 0        | 0        | 0        | 0      | 0      | 0         |
| BR_Parnaiba_05              | 0.931957  | 0         | 0         | 0         | 0         | 0        | 0        | 0        | 0        | 0        | 0        | 0      | 0        | 0        | 0        | 0      | 0      | 0.0680428 |
| BR_Parnamirim_09            | 0.782245  | 0.0971524 | 0.120603  | 0         | 0         | 0        | 0        | 0        | 0        | 0        | 0        | 0      | 0        | 0        | 0        | 0      | 0      | 0         |
| BR_PPrudente_14             | 0.216146  | 0.783854  | 0         | 0         | 0         | 0        | 0        | 0        | 0        | 0        | 0        | 0      | 0        | 0        | 0        | 0      | 0      | 0         |
| BR_RBranco_05               | 0.703704  | 0.222222  | 0.0740741 | 0         | 0         | 0        | 0        | 0        | 0        | 0        | 0        | 0      | 0        | 0        | 0        | 0      | 0      | 0         |
| BR_RBranco_11               | 0         | 1         | 0         | 0         | 0         | 0        | 0        | 0        | 0        | 0        | 0        | 0      | 0        | 0        | 0        | 0      | 0      | 0         |
| BR_Rib Preto_09             | 0.551661  | 0.448339  | 0         | 0         | 0         | 0        | 0        | 0        | 0        | 0        | 0        | 0      | 0        | 0        | 0        | 0      | 0      | 0         |
| BR_Rib Preto_11             | 0.420864  | 0.517524  | 0.0616117 | 0         | 0         | 0        | 0        | 0        | 0        | 0        | 0        | 0      | 0        | 0        | 0        | 0      | 0      | 0         |
| BR_Rib Preto_14             | 0         | 1         | 0         | 0         | 0         | 0        | 0        | 0        | 0        | 0        | 0        | 0      | 0        | 0        | 0        | 0      | 0      | 0         |
| BR_SBarbara_08              | 0         | 0         | 1         | 0         | 0         | 0        | 0        | 0        | 0        | 0        | 0        | 0      | 0        | 0        | 0        | 0      | 0      | 0         |
| BR_SJR Preto_08             | 0.680575  | 0.22624   | 0.093185  | 0         | 0         | 0        | 0        | 0        | 0        | 0        | 0        | 0      | 0        | 0        | 0        | 0      | 0      | 0         |
| BR_SJR Preto_14             | 0.417278  | 0.582722  | 0         | 0         | 0         | 0        | 0        | 0        | 0        | 0        | 0        | 0      | 0        | 0        | 0        | 0      | 0      | 0         |
| BR_Urca_15                  | 0.245204  | 0.690048  | 0.0647482 | 0         | 0         | 0        | 0        | 0        | 0        | 0        | 0        | 0      | 0        | 0        | 0        | 0      | 0      | 0         |
| BR_VVilha_06                | 0.502984  | 0.497016  | 0         | 0         | 0         | 0        | 0        | 0        | 0        | 0        | 0        | 0      | 0        | 0        | 0        | 0      | 0      | 0         |
| CA_Yaounde_14               | 0         | 0         | 0         | 0.224201  | 0.147865  | 0        | 0        | 0.086514 | 0        | 0        | 0.291207 | 0      | 0        | 0.145038 | 0.105174 | 0      | 0      | 0         |
| CO_Cali_13                  | 0         | 1         | 0         | 0         | 0         | 0        | 0        | 0        | 0        | 0        | 0        | 0      | 0        | 0        | 0        | 0      | 0      | 0         |
| DO_Dominica_09              | 0.355408  | 0.644592  | 0         | 0         | 0         | 0        | 0        | 0        | 0        | 0        | 0        | 0      | 0        | 0        | 0        | 0      | 0      | 0         |
| GB_Bijagos_09               | 0.0932331 | 0         | 0.13985   | 0.233083  | 0.279699  | 0.254135 | 0        | 0        | 0        | 0        | 0        | 0      | 0        | 0        | 0        | 0      | 0      | 0         |
| HA_Haiti_10                 | 0         | 0.679214  | 0         | 0         | 0         | 0        | 0        | 0        | 0        | 0.320786 | 0        | 0      | 0        | 0        | 0        | 0      | 0      | 0         |
| KE_Nairobi_12               | 0.794717  | 0         | 0.205283  | 0         | 0         | 0        | 0        | 0        | 0        | 0        | 0        | 0      | 0        | 0        | 0        | 0      | 0      | 0         |
| MX_Amacuzac_14              | 0         | 1         | 0         | 0         | 0         | 0        | 0        | 0        | 0        | 0        | 0        | 0      | 0        | 0        | 0        | 0      | 0      | 0         |
| MX_Iguala_12                | 0         | 1         | 0         | 0         | 0         | 0        | 0        | 0        | 0        | 0        | 0        | 0      | 0        | 0        | 0        | 0      | 0      | 0         |
| MX_Mazatan_12               | 0         | 1         | 0         | 0         | 0         | 0        | 0        | 0        | 0        | 0        | 0        | 0      | 0        | 0        | 0        | 0      | 0      | 0         |
| PH_Cbu_13                   | 0.511637  | 0.140419  | 0.347944  | 0         | 0         | 0        | 0        | 0        | 0        | 0        | 0        | 0      | 0        | 0        | 0        | 0      | 0      | 0         |
| SA_Jeddah_12                | 0.46947   | 0.53053   | 0         | 0         | 0         | 0        | 0        | 0        | 0        | 0        | 0        | 0      | 0        | 0        | 0        | 0      | 0      | 0         |
| SN_Goudiri_12               | 0.399905  | 0         | 0.146831  | 0.158052  | 0.0749672 | 0.220246 | 0        | 0        | 0        | 0        | 0        | 0      | 0        | 0        | 0        | 0      | 0      | 0         |
| SN_Ngari_12                 | 0         | 0         | 0.081796  | 0.591242  | 0         | 0        | 0        | 0        | 0.326962 | 0        | 0        | 0      | 0        | 0        | 0        | 0      | 0      | 0         |
| SN_Sedhiou_12               | 0.241943  | 0.758057  | 0         | 0         | 0         | 0        | 0        | 0        | 0        | 0        | 0        | 0      | 0        | 0        | 0        | 0      | 0      | 0         |
| TH_Bangkok_13               | 0.182957  | 0.614035  | 0         | 0         | 0         | 0        | 0        | 0        | 0        | 0        | 0        | 0      | 0.203008 | 0        | 0        | 0      | 0      | 0         |
| UG_Lunyo_13                 | 0         | 0         | 0         | 0         | 0         | 0.19145  | 0.188162 | 0.124589 | 0.329193 | 0        | 0        | 0      | 0        | 0.166606 | 0        | 0      | 0      | 0         |
| US_California_13            | 0         | 1         | 0         | 0         | 0         | 0        | 0        | 0        | 0        | 0        | 0        | 0      | 0        | 0        | 0        | 0      | 0      | 0         |
| US_Hawaii_09                | 0.55015   | 0.44985   | 0         | 0         | 0         | 0        | 0        | 0        | 0        | 0        | 0        | 0      | 0        | 0        | 0        | 0      | 0      | 0         |
| US_NOrleans_12              | 0         | 1         | 0         | 0         | 0         | 0        | 0        | 0        | 0        | 0        | 0        | 0      | 0        | 0        | 0        | 0      | 0      | 0         |
| US_PuertoRico_14            | 0         | 1         | 0         | 0         | 0         | 0        | 0        | 0        | 0        | 0        | 0        | 0      | 0        | 0        | 0        | 0      | 0      | 0         |
| US_Tucson_12                | 1         | 0         | 0         | 0         | 0         | 0        | 0        | 0        | 0        | 0        | 0        | 0      | 0        | 0        | 0        | 0      | 0      | 0         |
| VE_Zulia_04                 | 0         | 0.137147  | 0.862853  | 0         | 0         | 0        | 0        | 0        | 0        | 0        | 0        | 0      | 0        | 0        | 0        | 0      | 0      | 0         |

\* Name of populations is preceded by the code of the country\*\* and followed by the year of collection (2Dxx)

\*\* AU (Australia), BR (Brazil), CA (Cameroun), CO (Colombia), DO (Dominica), GB (Gabon), HA (Haiti), KE (Kenya), MX (Mexico), PH (Philippines), AS (Saudi Arabia), SN (Senegal), TH (Thailand), UG (Uganda), US (United States), VE (Venezuela)
