# Supplementary material for: Evolution of kdr haplotypes in worldwide populations of Aedes aegypti: Independent origins of the F1534C kdr mutation
Source: PubMed Central journal article supplement (PMC7188295; doi:10.1371/journal.pntd.0008219), 2020-04-16
Supplement: pntd.0008219.s006.pdf [file pntd.0008219.s006.pdf]

Supplementary Material S6

Alignment of nucleotide sequences of IIS6 haplotypes

```

<----- exon 20 -----|----- intron 20 ----->
          989                               1011
          |                               |
          I E S/P M W D C M L V G D V S C I P F F L A T V V I/M G N L V
#2s6_A_03 GATCGAATCCATGTGGGATTGTATGCTTGTGGGTGACGTGTCTGTATTCCGTTCTTTTGGCCACCGTAGTGATAGGAAATCTAGTtagtaagtattccgtttgggagttcttctataag [120]
#2s6_A_01 .....G.....
#2s6_A_02 .....C.....
#2s6_A_06 .....C.....
#2s6_A_19 .....T.....
#2s6_A_22 .....a.....a...g...
#2s6_B_00 .....a.....a...g...
#2s6_B_04 .....a.....a...g...
#2s6_B_05 .....a.....a...g...
#2s6_B_07 .....a.....a...g...
#2s6_B_08 .....a.....a...g...
#2s6_B_09 .....a.....a...g...
#2s6_B_10 .....c.....a...g...
#2s6_B_11 .....a.....a...g...
#2s6_B_12 .....a.....a...g...
#2s6_B_13 .....a.....a...g...
#2s6_B_14 .....a.....a...g...
#2s6_B_15 .....a.....a...g...
#2s6_B_16 .....a.....a...g...
#2s6_B_17 .....a.....a...g...
#2s6_B_18 .....a.....a...g...
#2s6_B_20 .....a.....a...g...
#2s6_B_21 .....C.....a...g...
#2s6_B_23 .....a.....a...g...
#2s6_B_24 .....A.....c.....a...g...
#2s6_B_25 .....t.....a...g...

```

```

<----- intron 20 ----->
#2s6_A_03 gctgactgaaagtaaattggagcgcacaacaagacctgttatgctgtaagttccagcactaaatttctcaggttgaattgcagtagttcaatcgaaatctcgaactttcattttgataac [240]
#2s6_A_01 .....
#2s6_A_02 .....
#2s6_A_06 .....
#2s6_A_19 .....g.....a
#2s6_A_22 .....g.....a
#2s6_B_00 .....a.....t.cgt-----G...ca.c...ac.----.c.g.g.c...g
#2s6_B_04 .....g.....t.....g.a.....t.cgt-----G...ca.c...a----T----.c.g.g.c...g
#2s6_B_05 .....a.....t.cgt-----G...ca.c...a----.c.g.g.c...g
#2s6_B_07 .....g.....t.....a.....t.cgt-----G...ca.c...a----.c.g.g.c...g
#2s6_B_08 .....t.....a.....t.cgt-----G...ca.c...a----.c.g.g.c...g
#2s6_B_09 .....a.....t.cgt-----G...ca.c...a----.c.GA.g.c...g
#2s6_B_10 .....cca.a.....t.cgt-----G...ca.c...a----.GC.g.g.c...g
#2s6_B_11 .....a.....t.cgt-----G...ca.c...a----.c.g.g.c...g
#2s6_B_12 .....a.....t.cgt-----G...ca.c...a----.c.g.g.c...g
#2s6_B_13 .....g.....a.....t.cgt-----G...CA-----c.g.g.c...g
#2s6_B_14 .....a.....t.cgt-----G...ca.c...a----.c.g.g.c...g
#2s6_B_15 .....g.....t.....a.....t.cgt-----G...CA.a...a----.c.g.g.c...g
#2s6_B_16 .....a.....t.cgt-----G...CA.a...a----.c.g.g.c...g
#2s6_B_17 .....t.a.....t.cgt-----G...ca.c...a----T.c.a.g.c...g
#2s6_B_18 .....cca.a.....t.cgt-----G...ca.c...a----.GC.g.g.c...g
#2s6_B_20 .....a.....t.cgt-----G...ca.c...a----.c.g.g.c...g
#2s6_B_21 .....a.....t.cgt-----G...ca.c...a----T.c.a.g.c...g
#2s6_B_23 .....a.....t.cgt-----G...ca.c...a----T.c.g.g.c...g
#2s6_B_24 .....g.....a.....t.cgt-----G...ca.t...a.a----.g.g.c...g
#2s6_B_25 .....a.....t.cgt-----G...ca.c...a----.c.g.g.c...g

```
