# Supplementary material for: Evolution of kdr haplotypes in worldwide populations of Aedes aegypti: Independent origins of the F1534C kdr mutation
Source: PubMed Central journal article supplement (PMC7188295; doi:10.1371/journal.pntd.0008219), 2020-04-16
Supplement: pntd.0008219.s008.pdf [file pntd.0008219.s008.pdf]

<-----intron 31-----|-----exon 32----->

1605

W R P Q A I V F E I V T/A N K K F D M I I

```
#3s6_00 cgcacatcaactgtgacgtattccttcctaattctcgctattctcaatttcagTGGCGACCACAAGCAATAGTATTCGAAATAGTTACCAATAAGAAGTTCGACATGATCATCAT [354]
#3s6_10 .....
#3s6_13 .....
#3s6_01 .....
#3s6_11 .....
#3s6_09 .....g.....
#3s6_17 .....G.....
#3s6_03 .....
#3s6_12 .....
#3s6_04 .....
#3s6_05 .....
#3s6_07 .....
#3s6_02 .....t.g....a.c....c..c.....
#3s6_06 .....t.g....a.c....c..c.....
#3s6_08 .....t.g....a.c....c..c.....
#3s6_14 t-.t.g.....a...a.a...t.....a.c....c..c.....
#3s6_15 t-.t.g.....a.....t.....a.c....c..c.....
#3s6_16 t-.t.g.....a.....t.....a.c....c..c.....
```
